# Supplementary material for: Transcriptomics and RNA-Based Therapeutics as Potential Approaches to Manage SARS-CoV-2 Infection
Source: MDPI journal article supplement (doi:10.3390/ijms231911058), 2022-09-21
Supplement: s1 [file s1]

## Supplementary Information.

**Table S1.** Comparison of the most commonly used sequencing platforms for SARS-CoV-2 sequencing.

| Platform | Cost and maintenance                                                      | Advantages                                                                                                                                           | Limitations                                              | Genome SARS-CoV-2 cost and coverage                                                                                                       | Sequencing yield and samples per run            | Pipeline                                                                                                                                                                                                                                    |
|----------|---------------------------------------------------------------------------|------------------------------------------------------------------------------------------------------------------------------------------------------|----------------------------------------------------------|-------------------------------------------------------------------------------------------------------------------------------------------|-------------------------------------------------|---------------------------------------------------------------------------------------------------------------------------------------------------------------------------------------------------------------------------------------------|
| Illumina | Moderate sequencing cost, high start-up cost. Frequent maintenance [240]. | High capacity to sequence large volumes of samples. High accuracy in SNV. Well-established methods of analysis [240]. Clinical application use [241] | High cost of maintenance. 300pb maximum read size [240]. | 32.5 USD per genome on Illumina NextSeq 550.<br><br>Coverage 300-600x, $\geq 99\%$ , [242,243]<br><br>Sample viral load up to 30 Ct value | 1.2-6000Gb[243]<br><br>12-3072 samples per run. | Base calling and demultiplexing with Bcl2Fastq [244].<br><br>Removal adaptors and trimming with Cutadapt [245] and Trimmomatic [246].<br><br>Alignment with Bowtie2 [247].<br><br>Variant calling with Samtools mpileup and BCFtools [248]. |

|                     |                                                                              |                                                                                                                                    |                                                                                                                      |                                                                                                                   |                                                 |                                                                                                                                         |
|---------------------|------------------------------------------------------------------------------|------------------------------------------------------------------------------------------------------------------------------------|----------------------------------------------------------------------------------------------------------------------|-------------------------------------------------------------------------------------------------------------------|-------------------------------------------------|-----------------------------------------------------------------------------------------------------------------------------------------|
| Oxford Nanopore     | Low cost of sequencing, low start-up cost. Without maintenance [240].        | Very portable sequencer. It is obtaining data in real-time. Long reads 13-20 kb. RNA-direct sequencing [240].                      | They are constantly changing analysis methods. Moderate accuracy in SNV [249]. Homopolymers complicated to sequence. | 29 USD per genome on MinION[249]. Coverage 800-1000x, $\geq 99\%$ , Sample viral load up to 31 Ct value [249]     | 1.8-245Gb[250] 12-2,304 samples per run.        | Base calling and demultiplexing with Guppy [251]. Alignment with Minimap2 [252]. Variant calling with Nanopolish [253] or Medaka [254]. |
| Ion Torrent         | Moderate start-up and sequencing cost. Frequent maintenance [240].           | Library generation automatic. High accuracy in SNV. Fast sequencing.                                                               | Homopolymers complicated to sequence.                                                                                | 122 USD per genome on GeneStudio S5 Coverage 3,000x, $\geq 99\%$ , [255] Sample viral load up to 38 Ct value[256] | 0.5-50Gb[257] 2-80 samples per run.             | Similar pipeline to Illumina can be used.                                                                                               |
| Pacific Biosciences | Moderately high cost of sequencing and start-up. Frequent maintenance [240]. | Long reads 10-16 kb. Sequencing genomic regions such as high/low G + C, tandem repeat, and interspersed repeat regions. RNA-direct | High raw error rate up to 8%, Low accuracy in SNV [258].                                                             |                                                                                                                   | 18-680Gb [259] Up to 900 samples per run [260]. | Demultiplexing with lima, USEARCH to reoriented 5'-3' direction, Cutadapt for trimming. Variant calling with Minimap2 [252].            |

sequencing [240].

---
